# Supplementary material
Source: MDPI journal article supplement (https://www.mdpi.com/1424-8247/15/4/427)

*Malva parviflora* Leaves and Fruits Mucilage as Natural Sources of Anti-inflammatory, Antitussive and Gastro-protective Agents: A Comparative Study Using Rat Models and Gas Chromatography

Supplementary

**Figure S1** GC/MS chromatograms of neutral (A) and acidic (B) polysaccharides in *M. parviflora* mucilage obtained from the fruits (MFM)

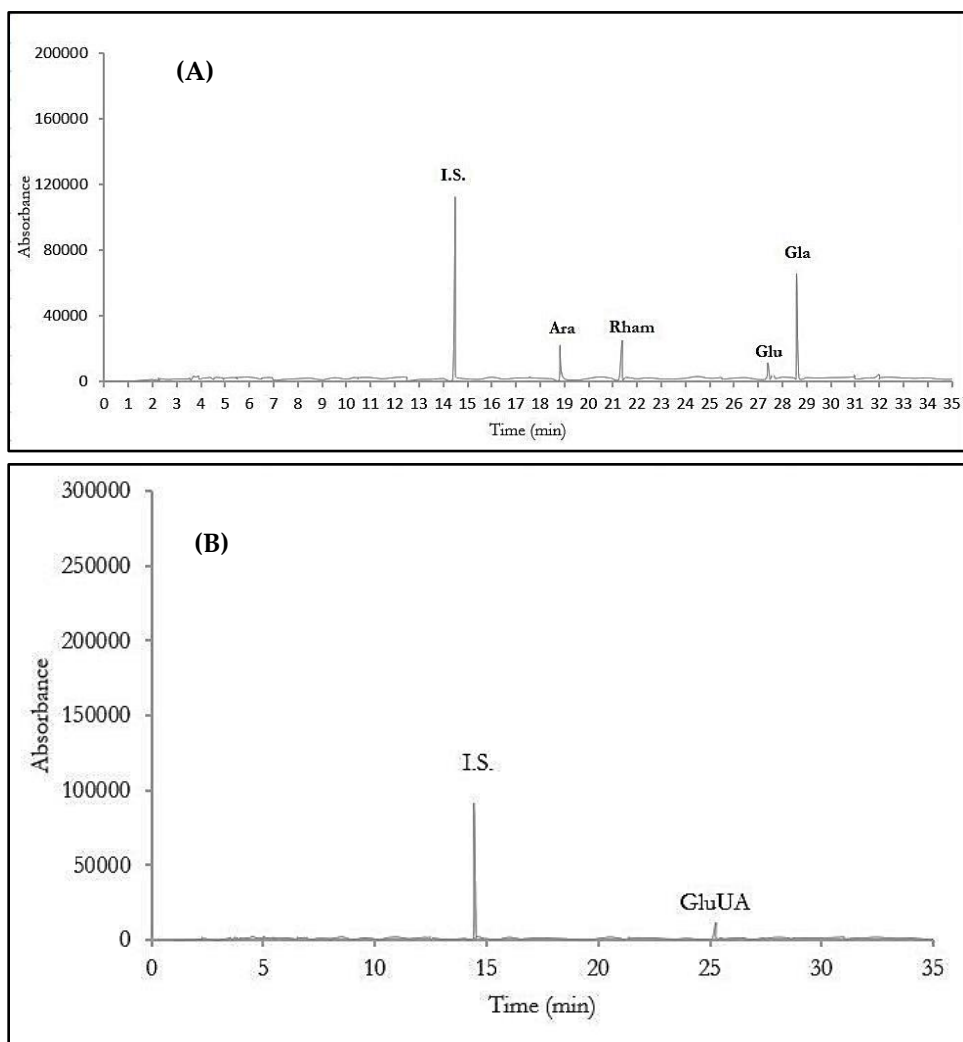

Supplement: s1 [file s1]
